# Supplementary material for: Single-Cell Transcriptomics of Pancreatic Cancer Precursors Demonstrates Epithelial and Microenvironmental Heterogeneity as an Early Event in Neoplastic Progression
Source: Oxford University Press journal article supplement (doi:10.1158/1078-0432.ccr-18-1955), 2018-11-01
Supplement: 10780432ccr181955-sup-203910_2_supp_5108937_pgv78n.docx [file 10780432ccr181955-sup-203910_2_supp_5108937_pgv78n.docx]

| **Case** | **Sex** | **Age** | **Location** | **Histological Subtype** | **Final Diagnosis** | **Tissue Analyzed** | **Mutations** | **Tumor cellularity based on Pathology/scRNA-seq (%)** |
| --- | --- | --- | --- | --- | --- | --- | --- | --- |
| LG.IPMN1 | F | 67 | Body | Gastric (focal Intestinal) | Multi-focal side branch IPMN (1.0cm) with LGD | IPMN | KRAS p.G12R  GNAS p.R201C | 80/87 |
| LG.IPMN2 | F | 76 | Head | Intestinal | Colloid Carcinoma Arising from a Mixed main and branch-duct IPMN (4.6cm) with intermediate-grade dysplasia | IPMN | GNAS p.R201C  BRAF p.D594N | 90/93 |
| HG.IPMN1 | M | 66 | Head | Pancreatobiliary | Moderate-differentiated adenocarcinoma arising from an IPMN (2.6cm) with HGD | IPMN | KRAS p.G12V  SMAD4 deletion | 60/90 |
| HG.IPMN2 | M | 59 | Head | Pancreatobiliary | Moderate-differentiated adenocarcinoma arising from a main duct IPMN (2.8cm) with HGD | IPMN | KRAS p.G12V  GNAS p.R201H | 40/47 |
| PDAC1 | M | 62 | Head |  | Moderate to poorly differentiated PDAC arising from IPMN | Adenocarcinoma | KRAS p.G12V  TP53 p.A161D | 90/88 |
| PDAC2 | M | 59 | Tail |  | Poorly differentiated with mucinous features PDAC with peritoneal metastasis | Adenocarcinoma | KRAS p.G12V | 20/34 |

**Supplementary Table 1**
