# Supplementary material for: Single-Cell Transcriptomics of Pancreatic Cancer Precursors Demonstrates Epithelial and Microenvironmental Heterogeneity as an Early Event in Neoplastic Progression
Source: Oxford University Press journal article supplement (doi:10.1158/1078-0432.ccr-18-1955), 2018-11-01
Supplement: 10780432ccr181955-sup-203910_2_supp_5108938_pgv78n.xlsx [file 10780432ccr181955-sup-203910_2_supp_5108938_pgv78n.xlsx]

## Sheet: Sheet1
Epithelial and Adenocarcinoma
MUC1
KRT18
CEACAM6
MUC5AC
Myeloid Cells
PTPRC
ITGAM
ITGB2
Lymphocytes
PTPRC
CD3D
CD3E
CD3G
Myofibroblasts
VIM
FAP
ACTA2
THY1
