# Supplementary material for: Single-Cell Transcriptomics of Pancreatic Cancer Precursors Demonstrates Epithelial and Microenvironmental Heterogeneity as an Early Event in Neoplastic Progression
Source: Oxford University Press journal article supplement (doi:10.1158/1078-0432.ccr-18-1955), 2018-11-01
Supplement: 10780432ccr181955-sup-203910_2_supp_5108939_pgv78n.xlsx [file 10780432ccr181955-sup-203910_2_supp_5108939_pgv78n.xlsx]

## Sheet: RevisedClusters0
	avg_logFC	p_val_adj	cluster	gene	Name	Literature	Literature	Literature
1	2.37402	0	LG.Ep1	PGC	Progastricsin	Pancreatic cancer stem cells show a restricted metabolic plasticity and therefore rely heavily on oxidative metabolism. PGC-1α as a downstream target of MYC suppression acts as a key determinant for this dependency (PMID: 26365176)	The FOXO3/PGC-1β signaling axis has a vital role in pancreatic cancer stem cells PMID: 28507102	Transcription factor coactivator influencing multiple cellular metabolic pathways and functions as a critical controler of cancer development, DOI: 10.1158/1535-7163.MCT-15-0621
2	2.20707	0	LG.Ep1	MUC5AC	Mucin 5AC	MUC5AC showed high expression levels in IPMN lesions on proteomic level and might be involved in development of pancreatic cancer PMID: 12210083	MUC5AC serum levels and cystic fluid levels in IPMN may be used as marker to evaluate dysplasia PMID: 20717734	MUC5AC expression may be an early event in PDAC carcinogenesis (PanIN I) DOI: https://doi.org/10.1053/gast.2002.36018
3	2.09391	0	LG.Ep1	CA2	Carbonic Anhydrase 2	IPMN lesions show high proteomic levels of CA2 in comparison to invasive pancreatic cancer. PMID: 29221926	Decreased CA2 levels are present in PDAC and correlate inversely with prognosis and differentiation doi: 10.1002/jso.23282.	Parallel presence of CA-II and AMY-α antibodies together with increased levels of IgG4 in the blood may help differentiate autoimmune pancreatitis from pancreatic cancer PMCID: PMC4389022
4	1.80293	0	LG.Ep1	TFF2	Trefoil factor 2	TFF2 may help pancreatic tumor cell migration as this familiy of peptides promotes wound healing in the gastrointestinal tract. PMID: 22286382	Data from IPMN animal models point to a faciliated formation of IPMN based on the loss of TTF2 in from pancreatic ductal progenitor regions PMID: 27523981
5	2.371	1.51287e-281	LG.Ep1	MT1G	Metallothionein 1G	Metallothionein expression in pancreatic cancer has been shown to be related to metastasis and poor prognosis PMID: 8642045
6	1.83555	3.84346e-233	LG.Ep1	PSCA	Prostate stem cell antigen	PSCA shows high expression levels in PDAC compared to normal and inflammatory pancreatic tissue. In-vivo PSCA blockage resulted in a significant tumor growth inhibition and progression PMID: 16024997	PSCA expression has been frequently reported at a high level in PDAC and has also been suggested as a targeted molecule in cancer treatment PMC3472140 PMCID: PMC3183449
7	1.94429	8.99459e-174	LG.Ep1	XIST	X-inactive specific transcript	XIST has been shown to be involved in PDAC's progression with prognostic implications PMID: 28295543
8	1.7782	6.33367e-172	LG.Ep1	MT1E	Metallothionein 1E	Metallothionein expression in general has shown prognostic potential in PDAC as it's tissue levels increase within tumor progression. PMID: 8642045
9	1.65269	5.76699e-171	LG.Ep1	DPCR1	Diffuse panbronchiolitis critical region 1	Upregulation of DPCR1 is inversely correlated with survival based on in vitro and in vivo knock down studies PMID: 29242154
10	1.51339	9.71145e-155	LG.Ep1	VSIG2	V-set and immunoglobulin domain containing 2	No significant literature reports in association with pancreatic cancer or precursor lesions
11	1.70562	3.37964e-125	LG.Ep1	ALDH3A1	Aldehyde dehydrogenase 3 family member A1	ALDH3A1 expression is partly regulated by Nuclear factor E2 related factor-2 (NRF2) as shown by knock down experiments which in turn sensitizes PDAC cells to 5-FU based chemotherapy DOI: 10.3390/antiox6030052
12	1.48934	3.48761e-121	LG.Ep1	MSMB	Microseminoprotein beta	No significant literature reports in association with pancreatic cancer or precursor lesions
13	1.28156	8.02785e-119	LG.Ep1	STARD10	StAR related lipid transfer domain containing 10	No significant literature reports in association with pancreatic cancer or precursor lesions
14	1.47805	8.57366e-115	LG.Ep1	MYRF	Myelin regulatory factor	No significant literature reports in association with pancreatic cancer or precursor lesions
15	1.31798	2.50736e-110	LG.Ep1	ERN2	Endoplasmic reticulum to nucleus signaling 2	No significant literature reports in association with pancreatic cancer or precursor lesions
16	1.92735	8.57318e-94	LG.Ep1	MUC6	Mucin 6	IPMN and PanIN show high expression levels of MUC6 at very early stages of PanIN, IPMN and MCN DOI: https://doi.org/10.1053/gast.2002.36018 PMID: 20139757
17	1.21795	1.2484e-87	LG.Ep1	ANXA10	Annexin A10	ANXA10 has been proposed as marker for invasivness in pancreatic cancer precursor lesions PMID: 28369074
18	1.73205	1.40676e-87	LG.Ep1	MTRNR2L1	Humanin-Like 1	No significant literature reports in association with pancreatic cancer or precursor lesions
19	1.43789	1.17679e-85	LG.Ep1	ASCC2	Activating Signal Cointegrator 1 Complex Subunit 2	No significant literature reports in association with pancreatic cancer or precursor lesions
20	1.41877	1.69236e-80	LG.Ep1	SULT1C2	Sulfotransferase Family 1C Member 2	Expression of SULT1C2 correlated with overall survival in a PDAC cohort from the Cancer Genom Atlas PMID: 28687745	Overexpression of SULT1C2 was reported in precursor lesions and PDAC compared to normal tissue PMID: 29137350
21	1.58463	7.17639e-80	LG.Ep1	MTRNR2L2	Humanin-Like 2	No significant literature reports in association with pancreatic cancer or precursor lesions
22	1.43827	3.01237e-69	LG.Ep1	CYP2C9	Cytochrom P450 2C9	Based on a microarray analysis of PDAC samples CYP2C9 belonged to the 10 top enriched genes DOI 10.1007/s00018-003-3036-5
23	1.24401	8.95747e-63	LG.Ep1	RASSF6	Ras association domain family 6	PDAC tissue shows a decreased expression of RASSF6 measured by immunohistochemistry and real-time quantitative reverse transcription-PCR. This low expression is associated with worse overall survival in PDAC patients PMID: 26074700	Reports point to a tumor suppressor role of RASSF6 by regulation of apoptosis and cell cycle via NF-κB and JNK signaling pathways in multiple cancer entities PMID: 26690221
24	1.1733	2.9153e-56	LG.Ep1	ARHGEF16	Rho guanine nucleotide exchange factor 16	No significant literature reports in association with pancreatic cancer or precursor lesions
25	1.2703	1.05946e-51	LG.Ep1	BPIFB1	BPI fold containing family B member 1	No significant literature reports in association with pancreatic cancer or precursor lesions
26	1.05653	1.58027e-94	HG.Ep	GSTP1	Glutathione S-transferase pi 1	Glutathione S-transferase gene polymorphisms have an impact on the drug metabolism in the pancreas and therefore also effect patients survival and outcome. GSTP1*C variant was confirmed to show a positive effect in PDAC patients treated with 5-FU and also showed a possible potential protective effect in elderly patients. PMID: 17265526
27	1.58216	3.58443e-94	HG.Ep	LMO4	LIM domain only 4	LMO4 highest expression levels are present only in late stage pancreatic cancer based on an extensive mRNA studies in cell lines, multiple precuror lesions (PanIN, IPMN) and pancreatic cancer samples. PMCID: PMC2628350	High levels of LMO4 are associated with a better prognosis in resected PDAC specimens compared to low or no LMO4 expression PMID: 18231110
28	1.19407	7.86002e-88	HG.Ep	CD24	Cluster of differntiation 24	A small subpopulation of CD44+CD24+ESA+ cells isolated from primary pancreatic cancer cells showed significantly higher tumorigenic potential PMID: 17283135	Immunhistological studies showed a distinct pattern of CD24 staining mainly in higher grade pancreatic cancer precursor lesions (PanIN III vs. PanIN I and II) PMCID: PMC4917090 Mass spectrometry-based proteomics studies revealed a co-expression of annexin A10 in CD24+ PDAC cells especially in invasive carcinoma and high grade lesions which may be correlated to progression of non-invasive to invas…
29	0.995092	4.94127e-76	HG.Ep	CYSTM1	Cysteine rich transmembrane module containing 1	No significant literature reports in association with pancreatic cancer or precursor lesions
30	1.03417	9.84924e-74	HG.Ep	TAGLN2	transgelin 2	Immunohistochemistry studies revealed a higher expression of TAGLN2 in PDAC. PMID: 23527717	TAGLN2 is often referred as a marker of tumor progression and shows a prognostic potential in colorectal cancer and bladder cancer https://doi.org/10.1177/1010428317702650 doi: 10.1111/j.1349-7006.2009.01424.x doi:10.1038/bjc.2011.23
31	1.21699	5.74578e-72	HG.Ep	TESC	Tescalcin	No significant literature reports in association with pancreatic cancer or precursor lesions
32	0.99709	4.15654e-67	HG.Ep	TFF1	Trefoil factor 1	Pancreatic tumor organoids were used to recapitulate the full tumorigenesis of PDAC. Herein, a set of upregulated genes (Muc5ac, Muc6, and Tff1) indicate pancreatic cancer precursor lesions in comparison to normal pancreatic cancer organoids. PMID: 25557080	TFF1, was found to be up-regulated especially in early PanIN lesions (PanIN-I vs. PanIN-II/III) and shows a gradual decrease in higher precurcor lesions PMID: 15753353 PMID: 15753353 PMID: 21747314	In vivo overexpression of TFF1 had no effect on overall tumor growth but specifically increased the metastatic tumor burden PMID: 21747314
33	1.17546	5.00219e-64	HG.Ep	GPX2	Glutathione Peroxidase 2	No significant literature reports in association with pancreatic cancer or precursor lesions
34	1.11571	4.95818e-60	HG.Ep	CTSE	cathepsin E	Many reports suggest an association of CTSE at an early stage marker of PDAC pathogenesis with reports of an overexpression in PDAC and PanIN lesions PMID: 8759606 PMID: 23814481 PMID: 29137350
35	1.00038	1.58543e-53	HG.Ep	MSLN	Mesothelin	MSLN overexpression is frequently seen in invasive pancreatic cancer. This overexpression leads to constitutive activation of the transcription factor Stat3 and activation of cell cycle pathways PMCID: PMC3062508 PMID: 25125620 PMCID: PMC2929833	MSLN was found to be associated with IPMNs as compared with Normal Pancreatic Ductal Epithelium in gene expression profiling of 12 IPMNs with or without an associated invasive carcinoma PMID: 14982844	Several antibody-based therapeutic agents as well as vaccine and T-cell therapies directed at mesothelin are undergoing clinical evaluation, PMCID: PMC5477819
36	1.09988	4.68727e-52	HG.Ep	SPINK1	Pancreatic secretory trypsin inhibitor (PSTI)	Mutations in SPINK1 has been associated with hereditary pancreatitis and chronic pancreatitis. Additionally, overexpression of SPINK1 has prognostic significance in several cancers as higher levels indicate an increased risk of aggressiveness. PMID: 26656134	SPINK1 is expressed in normal human pancreatic acinar cells but also both SPINK1 and EGFR are expressed in most PanIN, IPMN, MCN and PDAC samples PMID: 23475261
37	1.18324	9.62832e-50	HG.Ep	SMIM24	Small integral membrane protein 24	SMIM24 has been shown to be down-regulated during recovery after pancreatitis. doi:10.1038/s41598-018-19392-0			#
38	0.846881	2.38603e-48	HG.Ep	S100P		S100P was found in nearly all IPMNs (highest fold change) as compared with normal pancreatic ductal epithelium in gene and immunohistological expression profiling. PMID: 14982844 PMID: 20153506	S100P overexpression is associated with PDAC invasiveness, tumor growth, and has been reported as an early marker of carcinogenesis PMID 17000674 PMID: 16061848 PMID: 17875703
39	0.97109	8.62859e-47	HG.Ep	LYZ	lysozyme	LYZ is included within the 100 overexpressed genes found in PDAC lesions https://doi.org/10.4161/cbt.3.12.1238
40	1.35304	3.92937e-43	HG.Ep	GADD45GIP1	Growth arrest and DNA damage-inducible proteins-interacting protein 1	High expression of nucleus accumbens-associated protein 1(NAC1) is considered to have an adverse effects on prognosis in PDAC through negative regulation of growth arrest and DNA-damage–inducible 45-γ interacting protein 1 (GADD45GIP1) DOI: 10.1111/pin.12020
41	1.03426	5.67339e-41	HG.Ep	ANXA4	Annexin A4	There are conflicting reports about ANXA4 gene expression in PAnIN (up and downregulation) PMCID: PMC2775073 PMID: 19373808 PMID: 26048190	ANXA4 has been associated with promotion of tumor invasion, drug resistance and has been suggested as a marker for metastasis PMID: 27100483 PMID: 15305381
43	0.86048	9.88178e-37	HG.Ep	C19orf53	Homo sapiens chromosome 19 open reading frame 53	No significant literature reports in association with pancreatic cancer or precursor lesions
44	1.00694	2.55858e-33	HG.Ep	AKR7A3	Aldo-keto reductase family 7 member A3	No significant literature reports in association with pancreatic cancer or precursor lesions
45	0.828375	2.24532e-29	HG.Ep	S100A10		S100A10 protein from micro-dissected PanIN cells showed a distinguished expression in different stages of intraepithelial neoplasia PMID: 19714807	S100A10 has been suggested as a tumor tissue protein biomarker PMCID: PMC3989178	S100A10 overexpression is considered to be a useful predictor for post-operative recurrences of PDAC DOI: 10.1200/jco.2013.31.4_suppl.194
46	1.01112	1.24225e-26	HG.Ep	CXCL17		CXCL17 is potentially related to an anti-neoplastic immune response in early precancer lesions of PDAC PMID 20955708	Aberrant expression of CXCL17 in pancreatic tumor cells mobilizes immature myeloid-derived cells and enhances tumor progression through formation of new blood vessels. PMCID: PMC3430639
47	0.899205	6.74998e-21	HG.Ep	STX10		No significant literature reports in association with pancreatic cancer or precursor lesions
48	0.824226	3.60554e-18	HG.Ep	CA9	Carbonic anhydrase IX	CA9 expression has been observed in normal and invasive pancreatic cancer tissues but has not been linked to prognosis or aggressiveness PMID: 14535878
49	0.822039	1.30763e-16	HG.Ep	MUC6		MUC6 expression is an early event in pancreatic cancer pre-neoplastic lesions and is exhibited across all stages PMID: 12360467
50	0.823542	9.8081e-16	HG.Ep	NBEAL2	Neurobeachin like 2	No significant literature reports in association with pancreatic cancer or precursor lesions
51	3.41806	0	Adenocarcinoma	KRT17	Kreatin 17	Keratins (including KRT17) are expressed primarily in the "basal like" subtype of PDAC with a correlation of worse OS PMID: 26343385	High expression levels of KRT17 in PDAC (especially in advanced stages) have been reported by several research groups. PMID: 12651607 PMID: 19260470 PMID: 22487470	KRT17 has been identified as one of three genes for discrimination between PDAC and normal pancreatic tissue PMID: 21060876
52	1.66192	1.12259e-214	Adenocarcinoma	CDKN2A	cyclin-dependent kinase Inhibitor 2A	CDKN2A has been identified as one of the top 4 gene associated with deleterious mutations in familial pancreatic cancer and is considered a main risk factor in these patients for the development of pancreatic cancer PMID: 25356972 PMID: 21150883	CDKN2A deletion is essential for pancreatic cancer development PMID: 28892048
53	1.75487	1.60533e-207	Adenocarcinoma	TM4SF1	Transmembrane 4 L Six Family Member 4	Tetraspanins in general are believed to participate in the regulation of cell adhesion, migration and differentiation in pancreatic development PMC3133913	Downregulation of TM4SF1 by microRNA, inhibits pancreatic cancer cell invasion and migration PMID: 24285464	TM4SF1 was found to be highly upregulated in a subset of pancreatic cancer cell line. Its role may involve control of cell migration by interaction with integrin proteins PMID: 15305381
54	2.0075	1.20983e-190	Adenocarcinoma	INSR	Insulin Receptor	Some articles show an increased expression of insulin receptor substrate-1 in PDAC PMID: 8607861	Aberrant insulin signalling seems to enhance the potential of PDAC cell lines in vitro to proliferate and survive, but not normal pancreatic ductal cells PMCID: PMC4233074
55	2.32392	2.23565e-190	Adenocarcinoma	PLAT/also known as t-PA	tissue-type plasminogen activator	Laurell et al. found an upregulated PLAT expression in PDACs compared to normal pancreatic tissue PMID: 16733850	PLAT is overexpressed in PDACs and plays an important role in proliferation, invasion, and angiogenesis of these tumors PMID: 19171142 PMCID: PMC1854952 PMID: 27010898	In vitro studies have shown that PLAT has a major role in tumor cell invasion PMID: 9482108
56	1.7659	1.63311e-184	Adenocarcinoma	TNS4	tensin 4	TNS4 is overexpressed in PDAC and enhances cell motility in pancreatic cancer. PMID: 22750970
57	1.82289	3.21233e-173	Adenocarcinoma	CEACAM6	carcinoembryonic antigen related cell adhesion molecule 6	CEACAM6 has been proposed as a novel biomarker in pancreatic adenocarcinoma and PanIN lesions by tissue microarray data. Low or abundant expression levels were associated with favorable prognosis PMID: 15729073	In vitro and in vivo models show that elevated levels of CEACAM6 promote epithelial-mesenchymal transition, invasion and metastasis in pancreatic cancer. Genetic silencing reverts this effect. PMID: 23857344 PMCID: PMC2409898 PMID: 14724575
58	1.6846	1.69237e-170	Adenocarcinoma	ARHGEF18	Rho/Rac Guanine Nucleotide Exchange Factor 18	No significant literature reports in association with pancreatic cancer or precursor lesions
59	2.17634	3.38211e-159	Adenocarcinoma	LEFTY1	left-right determination factor 1	LEFTY1 is expressed during pancreas embryogenesis and islet regeneration PMID: 18393305	LEFTY1 expression was found in pancreatic cancer cells at various expression levels, but its expression had no impact on survival PMID: 25708930
60	1.35553	1.01545e-141	Adenocarcinoma	C19orf33		C19orf33 has been found to be upregulated in PDAC vs. normal tissue and also indicates an unfavorable outcome PMCID: PMC3599097
61	1.21378	4.2996e-134	Adenocarcinoma	IFITM3	Interferon induced transmembrane protein 3	No significant literature reports in association with pancreatic cancer or precursor lesions
62	1.65153	5.29551e-128	Adenocarcinoma	EMP1	Epithelial membrane protein 1	EMP1 has been associated with cancer cell death, pancreatic tumerogenesis and metastasis in pancreatic cancer cell lines PMID: 15305381	EMP1 was one of the most upregulated genes in PanINs compared to normal pancreatic epithelial tissue in familial pancreatic cancer PMCID: PMC3553106
63	1.4809	2.74004e-120	Adenocarcinoma	NCOA7	Nuclear receptor coactivator 7	NCOA3 upregulates mucin 1 and 4 via transcriptional and post-translational changes in pancreatic cancer. PMID: 25531332
64	1.39665	2.28764e-119	Adenocarcinoma	MYADM	Myeloid associated differentiation marker	Overexpression of MYADM is present in > 80% of PDACs analyzed by proteomic profiling and validated by ICH PMCID: PMC2467510
65	1.28705	1.9351e-112	Adenocarcinoma	ATF3	Activating transcription factor-3	ATF3 is a sensitive marker for chronic tissue inflammation, proinflammatory cytokine release and physiological stress in pancreatic ductal adenocarcinoma PMID: 26929329
66	1.84407	2.12362e-112	Adenocarcinoma	MMP7	Matrix metalloproteinase-7	MMP7 participates in PDAC induction and progression. Fukuda et al show in a mouse model that MMP7 deletion inhibits tumor growth and invasiveness and provide evidence for a link between inflammatory damage and tumor initiation via STAT3 and MMP7 PMCID: PMC3075548	MMP7 is expressed by primary PDAC and preneoplastic lesions, it initiates metaplastic events in the pancreatic epithelium thus regulating the acinar-to-ductal metaplasia PMCID: PMC150998	Many repotrs show an involvement of MMP-7 in pancreatic cancer cell migration, invasion, transdifferentiation, neoangiogenesis and necrosis PMID: 16311341 PMID: 27429508 PMID: 18042722
67	1.18279	1.37438e-110	Adenocarcinoma	TOB1	Transducer of ERBB2, 1	No significant literature reports in association with pancreatic cancer or precursor lesions
68	1.48559	5.1847e-110	Adenocarcinoma	MUC4	Mucin 4	MUC4 has a distinct role in pancreatic tumor progression and metastasis and its expression is maintained in the primary tumor as well as in secondary metastatic lesions ‘ PMID: 24047396	MUC4 expression incerases proliferation and metastasis of PDAC cells and decreases sensitivity to therapeutic agents, PMID: 28460571 PMID: 22580602	Minor MUC4 expression shows an inverse prognostic effect in PDAC patients receiving gemcitabine after surgical resection PMID: 28270046
69	1.23832	1.07202e-108	Adenocarcinoma	TACSTD2/also known as TROP2	Tumor-associated calcium signal transducer 2	TROP2 has been proposed as a prognostic biomarker in PDAC patients and high tissue expression points to an adverse outcome PMID: 18813308
70	1.69447	1.46942e-103	Adenocarcinoma	PTGS2	Prostaglandin-endoperoxide synthase 2/ also known as COX-2	in a meta-analysis of microarray data on pancreatic cancer, PTGS2 is reported to be overexpressed. A decrease in PTGS2 was correlated with invasive potential of pancreatic cancer cells PMID: 15897887 PMID: 15466186	Cox-2 expression is mediated by Mucin 1 in pancreatic cancer and increased transcriptomic expression has an adverse effect on patients outcome PMID: 26035123
71	1.2641	7.20898e-97	Adenocarcinoma	LAMC2	Laminin, gamma 2	LAMC2 has been proposed as a promising new putative pancreatic cancer biomarker PMID: 23798558
72	1.25316	1.20418e-88	Adenocarcinoma	ITPKC	Inositol-1,4,5-trisphosphate 3-kinase-C	No significant literature reports in association with pancreatic cancer or precursor lesions
73	1.36192	3.83489e-78	Adenocarcinoma	SERPINE1	also know as plasminogen activator inhibitor type 1, an inhibitor of urokinase-type plasminogen activator and tissue plasmin- ogen activator,	SerpinB2 has been associated with tumor cell migration in pancreatic and other cancer entities by regulation of the stromal remodelling. Additionally reports also account SERPINE1 for conversion to a stem cell-like phenotype PMID: 28346421	SERPINE1 expression is increased in epithelial pancreatic cancer cells undergoing EMT and in myofibroblasts at the invasive front of these tumors PMID: 19365582	Several important genes and microRNA that have an important role in PDAC cacinogenesis target SERPINE1 (PAI-1) which might account for the role of SERPINE1 in metastsis and EMT PMID: 27216198
74	1.43481	9.95419e-76	Adenocarcinoma	MMP1	Matrix metalloproteinase-1	MMP-1 upregulation may contribute to the pathogenesis of chronic pancreatitis and pancreatic cancer PMID: 23608755	MMP1 participates in the process of epithelial-to-mesenchymal transition and enhances invasivness of pancreatic cancer cells in vitro and in vivo PMCID: PMC4954934 PMID: 21288898
75	1.17119	3.10929e-70	Adenocarcinoma	RGS5	Regulator of G-protein signaling 5	Marker of cancer vasculature and the tumor’s proangiogenic microenvironment, PMCID: PMC3299962 PMCID: PMC2992685
76	3.38931	0	LG.Ep2	COL16A1	collagen, type XVI, alpha 1	COL16A1 is overexpressed in whole tumor tissue vs. normal pancreatic epithelial tissue PMID: 19260470	COL16A1 was reported to be downregulated in PDAC cell lines PMID: 15305381
77	3.24354	0	LG.Ep2	MUC2	Mucine 2	Tissue levels of MUC2 corresponds to prognosis in resected pancreatic cancer specimens PMID: 19587537	MUC2 is mainly expressed in less aggressive pancreatic cancers and in IPMNs with some reports suggesting a role in pancreatic cancer carcinogenesis PMID: 15113850 PMID: 19587529	MUC2 has been annotated to have a "tumor suppressor role" in an vivo mouse model of colorectal cancer PMID: 11872843
78	2.94869	0	LG.Ep2	SPINK4	Serine Peptidase Inhibitor, Kazal Type 4	No significant literature reports in association with pancreatic cancer or precursor lesions
79	2.8015	0	LG.Ep2	FCGBP	Fc-gamma binding protein	FCGBP is listed as one of nine candidate biomarkers for the differential diagnosis of pancreatic cysts through nanoscale liquid chromatography coupled to tandem mass spectrometry PMID: 26122842
80	2.5525	0	LG.Ep2	TFF3	Trefoil factor 3	As member of the trefoil peptide family, TFF3 together with TFF1 and 2 is significantly upregulated in intraductal papillary-mucinous tumors PMID: 12000726	TFF3 and TFF1 have an important role in tumor development of urologic malignancies and pancreatic cancers PMID: 15368472
81	1.88629	9.26829e-222	LG.Ep2	REG4	Regenerating family member 4	Serum REG4 has been proposed as a diagnostic tumor marker and prognostic biomarker in pancreatic cancer, including early-stages of the disease. PMID: 19789838 PMID: 19546835 PMID: 16918991	REG4 also has been proposed as a therapeutic target in PDACs PMID: 16918991 PMID: 19834624	Biologically, REG4 has been associated with tumor cell invasion and macrophage polarization PMID: 22957785 PMID: 26531138
82	2.7088	1.69612e-183	LG.Ep2	MEG3	Maternally Expressed 3 (lncRNAs)	LncRNA MEG3 shows prognostic value in PDAC patients. Additionally, MEG3 analysis points to a tumour suppressor function due to adverse outcome in low expression levels correlated to EMT induction, enhanced cancer stem cell phenotypes, and reduced chemoresistance PMID: 29328401	The lncRNA MEG3 negatively affects tumor growth and metastasis formation in pancreatic cancer. PMID: 28320094
83	2.05515	7.7012e-180	LG.Ep2	ITLN1	Intelectin 1	No significant literature reports in association with pancreatic cancer or precursor lesions
84	1.96853	2.94744e-176	LG.Ep2	SCNN1A	SCNN1A sodium channel epithelial 1 alpha subunit	No significant literature reports in association with pancreatic cancer or precursor lesions
85	1.98905	1.86327e-152	LG.Ep2	FAM3D	Family with sequence similarity 3 member D	Moffit et al. show that the 'classical' subtype of PDAC exhibits high gene expression levels of BTNL8, FAM3D and ATAD4 PMCID: PMC5370495
86	1.5337	6.40784e-152	LG.Ep2	LGALS4	Lectin, Galactoside-Binding, Soluble, 4/ also known as Galectin 4	LGALS4 expression is associated with diminished nodal metastasis and modulation of Wnt signaling pathway in pancreatic adenocarcinoma. PMCID: PMC4170638 PMID: 23824659	LGALS4 is proposed as one of several 'pancreatic progenitor’ biomarker PMID: 26909576
87	2.11959	8.63474e-149	LG.Ep2	ATP2C2	ATPase secretory pathway Ca2+ transporting 2/also known as Secretory Pathway Calcium ATPase 2	SPCA2 (ATP2C2) is highly upregulated in epithelial cancers, PMID: 26608610
88	1.81524	1.11039e-135	LG.Ep2	CLDN3	Claudin 3	In hepatocellular carcinoma, CLDN3 decreases tumor aggressiveness pointing to a possible prognostic biomarker. PMCID: PMC4202152
89	1.90504	9.26218e-120	LG.Ep2	HPN	Hepsin/ also known as Transmembrane Protease Serine 1	No significant literature reports in association with pancreatic cancer or precursor lesions
90	1.56666	4.93808e-115	LG.Ep2	LRRC26	Leucine-rich repeat-containing protein 26	No significant literature reports in association with pancreatic cancer or precursor lesions
91	1.80712	8.35397e-115	LG.Ep2	RAP1GAP	RAP1 GTPase activating protein	RAP1GAP is proposed as a putative tumor suppressor gene in pancreatic cancer. With histological progression from preneoplastic to invasive pancreatic cancer, a significant down-regulation of RAP1GAP is seen. This loss of expression is association with an adverse survival PMID 16424023	Rap1GAP inhibits tumor progression in endometrial cancer. PMID 28196746	Rap1GAP regulates renal cell carcinoma invasion., PMID 22266190
92	1.69944	2.04489e-107	LG.Ep2	JSRP1	Junctional sarcoplasmic reticulum protein 1	No significant literature reports in association with pancreatic cancer or precursor lesions
93	1.6902	9.21944e-104	LG.Ep2	IGFALS	Insulin Like Growth Factor Binding Protein Acid Labile Subunit	Individuals with higher circulating levels of the IGF1 ligand have an increased incidence for developing PDAC. Additioanlly, IGF1 overexpression in surrounding tumor stroma is associated with negative outcome PMID: 23493758 PMID: 22086503	Many reports focus on the mechanism and ability to target PDAC growth and sensitize chemotherapy resistance by targeting IGF1 PMID: 24809702 PMID: 27742686
94	1.61724	6.79063e-100	LG.Ep2	CPE	Carboxypeptidase E	CPE upnregulation contributes to chemoresistance and proliferation in PDAC. In contrast, CPE downregulation supresses tumor cell proiferation and invasion possibly by a direct regulation of NF-κB. PMID: 25374060
95	1.78101	6.8965e-92	LG.Ep2	REP15	RAB15 effector protein	No significant literature reports in association with pancreatic cancer or precursor lesions
96	1.62965	4.73545e-85	LG.Ep2	SLC26A6	Solute carrier family 26 member 6	Overexpression of SLC26A6 has been reported in 'classical tumor' suptypes PMID: 29186684	Contradictory data about role and expression in PDAC and pancreatic cancer cell lines PMID: 11087667 PMID: 18665094
97	1.5007	1.86376e-81	LG.Ep2	PIGR	polymeric immunoglobulin receptor	PIGR levels in plasma and pancreatic juice are significantly higher in PDAC patients compared to normal controls and PIGR alone and in combination with other markers has shown potential as a prognostic biomarker in pancreatic ductal adenocarcinoma PMID: 21653254 PMCID: PMC3561491 PMID: 27657339 PMID: 23579209	Functional analysis also attribute PIGR a role in EMT induction and tumor progression in cancer PMCID: PMC4232506 PMID: 22025622 PMID: 28173980
98	1.53145	5.60563e-79	LG.Ep2	C8orf4	Chromosome 8 open reading frame 4	No significant literature reports in association with pancreatic cancer or precursor lesions
99	1.47954	1.348e-70	LG.Ep2	RASD1	Ras related dexamethasone induced 1	No significant literature reports in association with pancreatic cancer or precursor lesions
100	1.46125	1.95979e-69	LG.Ep2	ABHD11	Abhydrolase domain containing 11	No significant literature reports in association with pancreatic cancer or precursor lesions
151	2.35468	7.27564e-170	Adenocarcinoma2	MUC17	Mucin 17	MUC17 is present in normal pancreatic tissues. Abscence of MUC17 in certain pancreatic cancer models shows higher aggressivness. Its involvement in pancreatic cancer development is not fully understood becauce of many contradictory data. PMID: 15494719 PMID: 11855812	Studies show a distinct MUC17 expression (together with MUC6 and 7 in approximately 50% of all PanIN and PDAC lesions). Nonetheless, no presence was observed after development of metastatic lesions PMCID: PMC3873635
152	2.27002	8.00222e-127	Adenocarcinoma2	TM4SF4	Transmembrane 4 L Six Family Member 4	TM4SF4 controls endocrine pancreas differentiation and serves as a specific gene for the identification of alpha cell populations. It also orchestrates pancreatic cancer cell migration PMCID: PMC3133913 PMCID: PMC5092539	TM4SF1 promotes chemoresistance especially to gemcitabine and is highly expressed in pancreatic cancer cells PMID: 26709920
153	2.43663	1.93414e-120	Adenocarcinoma2	DUOX2	Dual oxidase 2	Duox2-induced release of reactive oxygen species (ROS) promotes tissue damage caused by inflammation in chronic pancreatitis PMID: 23404210	Pancreatic presurcor lesions and pancreatic cancer overexpress DUOX2. This increase ultiamately leads to HIF-1α and VEGF-A up-regulation. PMCID: PMC5340089	Some human pancreatic cancer cell lines also express DUOX2. DUOX2 up-regulation is herein dependent on interferon induction PMID: 21321110 PMID: 23296709
154	2.00888	1.92011e-119	Adenocarcinoma2	PDZK1IP1	PDZK1 Interacting Protein 1	No significant literature reports in association with pancreatic cancer or precursor lesions
155	2.30678	2.40461e-119	Adenocarcinoma2	LCN2	Lipocalin-2	LCN2 enhances PDAC development in vivo and impacts the tumor microenviroment in a pro-tumorogenic way by regulating inflammation. LCN2 is upregulated in tumor tissue and leads to a secretion of proinflammatory cytokines PMID: 28249896 PMID: 28249896	LCN2 and TIMP1 are introduced as highly specific and sensitive potential serum biomarker for the detection of PDAC in familial pancreatic cancer. PMID: 23544163	LCN2 has also been linked to increased invasive potential and development of gemcitabine chemotherapy resistance in PDAC PMID: 23056397
156	1.84919	3.00802e-104	Adenocarcinoma2	COL17A1	Collagen, type XVII, alpha 1	COL17A1 is within a panel of 9 PDAC genes that are able to accurately classify PDAC using minimum-redundancy-maximum-relevance (mRMR) method from transcriptome data PMID: 28611293	Most of tumor collagen expression has been detected in the stromal compartment, only COL17A1 was found in significant levels in PDAC cancer cells. High expression of COL17A1 is also associated with adverse outcome in this cancer type. PMID: 26343385	Epithelial cancers that harbor an aberrant COL17A1 promoter methylation demonstrate an increased invasive capacity PMID: 27891193
157	2.5327	1.05665e-103	Adenocarcinoma2	DUOXA2	Dual Oxidase Activator 2	DUOXA2 was highlighted as a new highly upregulated genes in PDAC using cDNA microarrays. PMID: 12651607	DUOXA2 is necessary for ROS formation as it posttransciptioanally modifies DUOX2 and translocates the fuctional complex to the plasma membrane PMID: 16651268	DUOX2 and DUOXA2 are responsible for ROS producton in an interferon dependent manner in human colon and pancreatic cancer cells, PMID: 23296709
158	1.88571	1.58939e-100	Adenocarcinoma2	APOL1	Human apolipoprotein L1	Majority of reports point to a role of APOL1 in chronic kidney disease and some human cancers PMID: 22569246 002	By analysis of the malignant ascites proteome for pancreatic cancer biomarkers, APOL1 was in the 20 candidate biomarkers suitable for future validation studies PMID: 21932441	Several Apoproteins, including apolipoprotein E (APOE), inter-alpha-trypsin inhibitor heavy chain H3 (ITIH3), apolipoprotein A-I (APOA1), apolipoprotein L1 (APOL1) used in parallel with CA19-9 detection significantly increased the diagnostic performance versus Ca19-9 alone for the diagnosis of PC using >1000 proteins in 100 serum samples. PMID: 29123261
159	1.44049	2.93991e-98	Adenocarcinoma2	KRT8	Keratin 8	KRT8 was found to be highly expressed in PDAC using cDNA microarrays data PMID: 12651607	Pancreatic juice is a source of KRT8, which was highly expressed in patients with preneoplastic lesions (IPMN and PanIN) as well as invasive cancer (PDAC) PMID: 20550709	KRT8 together with KRT18 and KRT19 belongs to the major intermediate filaments of the exocrine pancreas. Besde their role in preservation of cytoarchitecture, they are also involved in a myriad of signaling proteins PMID: 17875703 PMID: 9614373
160	1.60669	1.02497e-96	Adenocarcinoma2	DHRS9	Dehydrogenase/reductase 9	DHRRS9 is included as one of 25 possible prognostic classifier for pancreatic cancer by analysing gene expression data of 695 pancreatic carcinoma samples PMID: 28927421
161	1.63388	7.43032e-96	Adenocarcinoma2	HLA.G	human leukocyte antigen (HLA) class I molecule	HLA-G participates in tumor immune evasion and host immune impairment , metastasis and predicts poor prognosis in pancreatic cancer, PMCID: PMC4656780 PMCID: PMC4749493
162	1.89024	9.3783e-89	Adenocarcinoma2	GPRC5A	G Protein-Coupled Receptor RAI3	GPRC5A may be an oncogene in PDAC that is upregulated by gemcitabine PMID: 27415424	GPRC5A acts as a potent oncogene in pancreatic cancer, mRNA expression data from 675 human cancer cell lines and 10,609 samples from The Cancer Genome Atlas, Microarray analysis showed that GPRC5A overexpression impacts several signaling networks. DOI: 10.1158/1538-7445.PANCA16-A41	GPRC5A is considered as an independent factor for cancer cell survival in PDAC PMID: 28114355
163	1.77827	4.03648e-83	Adenocarcinoma2	RAMP1	Receptor activity modifying protein 1	RAMP1 has been identified as one of 100 overexpressed genes in the SAGE analysis in PDAC PMID: 15477757	Adrenomedullin acts as a ligand for the RAMP1 receptor, an interaction that promotes invasiveness in a fraction of pancreatic cancer cells and additionally seems to have an effet on neoangiogenesis PMID: 17290391
164	1.54439	5.8903e-83	Adenocarcinoma2	MYO15B	Myosin XVB	MYO15B is one of 279 genes abberantly expressed in response to nutrient starvation in pancreatic cancer cell lines PMID: 28249167
165	1.65018	1.23826e-74	Adenocarcinoma2	KRT7	Keratin 7	Krt7 and Krt19 are induced during acinoductal metaplasia and remain expressed in tumour lesions PMID: 21730103	KRT7 is overexpressed in the vast majority of PDACs although KRT7 has also been suggested as marker of normal pancreatic duct epithelial cells. Its expression is inversely correlated with outcome in PDAC PMID: 19260470 PMID: 25242334
166	1.44602	1.87402e-71	Adenocarcinoma2	VSTM2L	V-Set And Transmembrane Domain Containing 2 Like	No significant literature reports in association with pancreatic cancer or precursor lesions
167	1.49663	2.20023e-69	Adenocarcinoma2	TFPI	Tissue Factor Pathway Inhibitor	TFPI-2 underexpression is associated with tumor invasion and metastasis and high expression levels show a better outcome. Low TFPI expression was found to be an independet prognostic factor for OS in PDAC PMID: 25755762	TFPI-2 epigenetic inactivation enhances tumor development and metastatic spread in PDAC PMID: 15592528
168	1.40156	3.07839e-67	Adenocarcinoma2	SERINC2	Serine incorporator 2	No significant literature reports in association with pancreatic cancer or precursor lesions
169	1.48575	5.717e-64	Adenocarcinoma2	KRT20	Keratin 20	The majority of PDACs overexpress KRT20. Its upregulation is associated with an adverse outcome and high levels of KRT20 have been shown to correlate with distant metastasis. Metastatic nodules themself show the highest KRT20 exhibition PMID: 16364723 PMID: 10537351 PMID: 11007036 PMID: 9242433 PMID: 10537351 PMID: 10590383
170	1.54406	2.94404e-63	Adenocarcinoma2	TINAGL1	Tubulointerstitial nephritis antigen like 1	No significant literature reports in association with pancreatic cancer or precursor lesions
171	1.70146	3.05142e-58	Adenocarcinoma2	IGFBP1	Insulin like growth factor binding protein 1	Patients with an increased serum level of IGFBP1 have an elevated risk for the development of PDAC. Additionally, certain genetic variance of IGFBP1 are significantly associated with increased pancreatic cancer risk PMID 17699799 PMID: 21852217
172	2.08456	8.19205e-55	Adenocarcinoma2	FABP1	Fatty acid binding protein 1	Diabetic patients with positive FABP1 staining show a significant positive correlation with pancreatic cancer. PMC3037918
173	1.92642	2.95703e-53	Adenocarcinoma2	PHGR1	Proline, histidine and glycine rich 1	No significant literature reports in association with pancreatic cancer or precursor lesions
174	1.64084	1.25719e-31	Adenocarcinoma2	PI3	Peptidase inhibitor 3	No significant literature reports in association with pancreatic cancer or precursor lesions
175	1.45458	3.7106e-18	Adenocarcinoma2	MUC5B	Mucin 5B	Pancreatic cancer is also accompanied by de novo expression of MUC5B in PanIN lesions and their expression increases further with disease progression. PMCID: PMC3934431	Pancreatic cancer lesions show an elevated levels of MUC5B mRNA against normal tissue samples PMID: 27230679
