# Supplementary material for: Single-Cell Transcriptomics of Pancreatic Cancer Precursors Demonstrates Epithelial and Microenvironmental Heterogeneity as an Early Event in Neoplastic Progression
Source: Oxford University Press journal article supplement (doi:10.1158/1078-0432.ccr-18-1955), 2018-11-01
Supplement: 10780432ccr181955-sup-203910_2_supp_5108940_pgv78n.xlsx [file 10780432ccr181955-sup-203910_2_supp_5108940_pgv78n.xlsx]

## Sheet: Sheet1
Ingenuity Canonical Pathways	-log(p-value)	z-score	Molecules
HG vs LG
Integrin Signaling	4.69	2.84	ARHGAP26,PFN1,RHOC,ARF1,ACTB,ARPC5,PPP1CB,TNK2,GSN,ACTR3,CAPN1,ARPC2,ARPC3,CAPN9,ACTG1,NEDD9,MYL12B,MYL12A
Signaling by Rho Family GTPases	3.89	2.324	GNAS,CFL1,MYL6,RHOC,ACTB,RACK1,ARPC5,JUN,ACTR3,ARHGEF16,ARPC2,ARPC3,ARHGEF2,CDC42EP1,GNG5,ACTG1,MYL12B,MYL12A
Wnt/β-catenin Signaling	1.81	1.134	UBB,MMP7,TGFBR1,SFRP2,JUN,FRZB,CSNK1G2,CD44,RPS27A,CCND1
Axonal Guidance Signaling	0.677	NaN	MMP7,PFN1,GNAS,CFL1,MYL6,C9orf3,RACK1,ARPC5,PLCD3,ACTR3,ARPC2,ARPC3,GNG5,MYL12B,MYL12A
Apoptosis Signaling	0.676	0	CAPN1,LMNA,CAPN9,BIRC3
Cell Cycle: G1/S Checkpoint Regulation	0.602	Nan	CCND2,RPL5,CCND1
PDAC vs LG
Integrin Signaling	15.9	6.102	PFN1,MAP3K11,MAPK1,ARF1,ARPC5,TSPAN3,ITGA3,RHOG,RHOB,ITGAV,ITGB5,ACTR2,RRAS,RAC1,ITGA6,TNK2,GSN,MYL9,ARHGAP5,RND3,CDC42,RHOA,ARPC2,IRS1,CAPN1,ZYX,CAPN2,ACTN4,ITGB6,ACTG1,RAP1B,RALA,ARPC1B,PPP1CB,ITGB8,ARF6,ACTR3,RHOD,ARPC3,VCL,RHOF,ACTN1,MYL12B,VASP,MYL12A,ITGB1,PXN,NRAS,RHOC,ACTB,ITGA2,ITGB2,CAPNS1,TSPAN1,PAK2,CAPN9,ARPC4
Signaling by Rho Family GTPases	10.8	6.03	MAP3K11,MAPK1,MYL6,ARPC5,RACK1,CDC42EP2,GNB1,STMN1,ITGA3,RHOG,RHOB,EZR,CDC42EP1,GNG12,ACTR2,CFL1,RAC1,MYL9,CDH1,RND3,CDC42,IRS1,ARPC2,ARHGEF16,RHOA,GNB2,ARHGEF18,ACTG1,RELA,ARPC1B,IQGAP1,ACTR3,RHOD,CDH3,ARPC3,RHOF,GNG5,MYL12B,MYL12A,ITGB1,ARHGEF12,GNAS,RHOC,ACTB,ITGA2,VIM,GNAI2,GNAI3,FOS,PRKCI,PAK2,ARPC4,MSN
Wnt/β-catenin Signaling	3.15	-0.243	CDKN2A,MMP7,SFRP2,FRZB,PPP2CA,CSNK1A1,BMPR2,SOX13,TGFB1,UBA52,CDH3,RARA,CSNK2B,CTNNB1,SOX4,UBB,MDM2,PPP2R5A,UBD,PPP2CB,CDH1,CD44,RPS27A,DKK1,UBC,LRP1
Axonal Guidance Signaling	6.11	Nan	DPYSL2,TUBA1B,BMP4,PFN1,MAPK1,MYL6,RACK1,ARPC5,TUBB,ADAM8,GNB1,PLCD3,ITGA3,SRGAP2,TUBA1C,GNG12,ACTR2,TUBB3,CFL1,RRAS,TUBB2A,RAC1,MYL9,MET,SDCBP,CDC42,RHOA,ARPC2,IRS1,GNB2,RTN4,EPHA2,RAP1B,MMP7,NTN4,ARPC1B,BMP2,EFNB2,ACTR3,RHOD,ARPC3,GNG5,VASP,MYL12B,BMP1,MYL12A,ITGB1,PXN,GNAS,NRAS,ARHGEF12,CHP1,ITGA2,EFNA1,GNAI2,GNAI3,TUBA1A,PRKCI,TUBB6,PAK2,ADAM10,SEMA4B,ADAM9,ARPC4,SEMA7A
Cell Cycle: G2/M DNA Damage Checkpoint Regulation	5.62	1.508	CDKN2A,CKS2,YWHAG,YWHAE,YWHAH,YWHAB,CDK7,WEE1,YWHAZ,MDM2,SKP1,YWHAQ,GADD45A,CDKN1A,SFN
Apoptosis Signaling	2.88	-0.258	RELA,NRAS,MAPK1,RRAS,LMNA,BCL2L1,CAPNS1,NFKBIA,CAPN1,CAPN2,CAPN9,CYCS,SPTAN1,MAP4K4,BIRC3,MCL1
Cell Cycle: G1/S Checkpoint Regulation	2.38	0.632	CDKN2A,CCNE1,CCND2,HDAC2,TGFB1,SMAD3,CDKN1A,RPL5,MDM2,SKP1,CDKN2B,HDAC5
TGF-β Signaling	1.46	2.333	FOS,BMP4,NRAS,MAPK1,RRAS,TGFB1,CDC42,BMP2,SMAD3,BMPR2,SERPINE1,PMEPA1
SAPK/JNK Signaling	0.985	2.714	GNB1,MAP3K11,NRAS,GADD45A,RRAS,CDC42,MAP3K13,IRS1,RAC1,GNG5,MAP4K4,HNRNPK
