# Supplementary material for: Single-Cell Transcriptomics of Pancreatic Cancer Precursors Demonstrates Epithelial and Microenvironmental Heterogeneity as an Early Event in Neoplastic Progression
Source: Oxford University Press journal article supplement (doi:10.1158/1078-0432.ccr-18-1955), 2018-11-01
Supplement: 10780432ccr181955-sup-203910_2_supp_5108941_pgv78n.xlsx [file 10780432ccr181955-sup-203910_2_supp_5108941_pgv78n.xlsx]

## Sheet: Sheet1
HG vs LG
Ingenuity Canonical Pathways	-log(p-value)	z-score	Molecules
EIF2 Signaling	30.6	4.914	RPS23,RPLP2,RPL35A,CCND1,RPS11,RPS7,RPS13,RPL23A,RPL19,ATF3,RPL36AL,RPL3,RPS8,RPL28,RPL10A,RPL9,RPL15,RPS6,PPP1R15A,RPL6,RPS25,RPL24,RPLP1,DDIT3,PPP1CB,RPL7A,RPS4X,RPS12,RPS5,RPS3,RPL31,RPL18,RPS24,RPS19,RPL4,RPL34,ACTB,RPL30,RPL23,RPS21,RPS29,FAU,RPL27,RPS15,RPS16,RPS27L,RPS27A,RPL5,RPS14
mTOR Signaling	9.17	2	RPS19,ULK1,RHOC,RPS8,RPS23,RPS21,RPS29,RPS4X,RPS11,FAU,RPS6,RPS7,RPS15,RPS16,RPS13,TSC2,RPS27L,RPS27A,RPS25,RPS5,RPS12,RPS3,RPS24,RPS14
Regulation of eIF4 and p70S6K Signaling	9.01	Nan	RPS19,RPS8,RPS23,RPS21,RPS29,RPS4X,RPS11,FAU,RPS6,RPS7,RPS15,RPS16,RPS13,RPS27L,RPS27A,RPS25,RPS5,RPS12,RPS3,RPS24,RPS14
Regulation of Actin-based Motility by Rho	6.2	2.714	PFN1,MYL6,CFL1,RHOC,ACTB,ARPC5,PPP1CB,GSN,ACTR3,ARPC2,ARPC3,MYL12B,MYL12A
Oxidative Phosphorylation	5.99	Nan	ATP5G2,ATP5H,UQCRH,COX7C,ATP5O,COX8A,ATP5L,NDUFB8,COX5A,COX7A2,NDUFAB1,ATP5G3,COX4I1,UQCRQ
RhoGDI Signaling	5.99	-2	GNAS,CFL1,MYL6,RHOC,ACTB,RACK1,ARPC5,ACTR3,ARPC2,ARHGEF16,CD44,ARPC3,ARHGEF2,GNG5,ACTG1,ARHGAP1,MYL12B,MYL12A
RhoA Signaling	5.32	3.207	PFN1,MYL6,CFL1,ACTB,ARPC5,PPP1CB,ACTR3,ARPC2,ARPC3,CDC42EP1,ARHGAP1,ACTG1,MYL12B,MYL12A
Mitochondrial Dysfunction	4.92	Nan	ATP5G2,ATP5H,PRDX5,UQCRH,COX7C,COX8A,ATP5O,ATP5L,NDUFB8,PRDX3,COX5A,COX7A2,NDUFAB1,ATP5G3,COX4I1,UQCRQ
Integrin Signaling	4.69	2.84	ARHGAP26,PFN1,RHOC,ARF1,ACTB,ARPC5,PPP1CB,TNK2,GSN,ACTR3,CAPN1,ARPC2,ARPC3,CAPN9,ACTG1,NEDD9,MYL12B,MYL12A
Signaling by Rho Family GTPases	3.89	2.324	GNAS,CFL1,MYL6,RHOC,ACTB,RACK1,ARPC5,JUN,ACTR3,ARHGEF16,ARPC2,ARPC3,ARHGEF2,CDC42EP1,GNG5,ACTG1,MYL12B,MYL12A
NRF2-mediated Oxidative Stress Response	3.22	0	AKR7A3,UBB,DNAJB4,ACTB,DNAJC15,FTL,JUN,GPX2,DNAJB1,CDC34,ACTG1,MGST3,GSTP1,FTH1
Granulocyte Adhesion and Diapedesis	3.04	Nan	MMP7,CLDN18,CCL20,CXCL5,IL1R2,CXCL3,CLDN4,IL1B,CXCL17,CXCL2,CLDN3,HSPB1,TNFRSF11B
Cdc42 Signaling	2.81	2.111	B2M,ACTR3,JUN,CFL1,MYL6,ARPC2,ARPC5,PPP1CB,ARPC3,TNK2,MYL12B,MYL12A
Agranulocyte Adhesion and Diapedesis	2.78	Nan	MMP7,MYL6,ACTB,CLDN18,CCL20,CXCL5,CXCL3,CLDN4,IL1B,CXCL17,CXCL2,ACTG1,CLDN3
Calcium Transport I	2.73	Nan	ANXA5,ATP2A3,ATP2C2
Remodeling of Epithelial Adherens Junctions	2.66	2	ACTR3,ACTB,ARPC2,ARPC5,ARPC3,ACTG1,DNM2
Cellular Effects of Sildenafil (Viagra)	2.62	Nan	PLCD3,CALM1 (includes others),GNAS,MYL6,ACTB,CACNA1C,PPP1CB,ACTG1,MYL12B,MYL12A
Actin Cytoskeleton Signaling	2.55	2.673	PFN1,MYL6,CFL1,ACTB,ARPC5,PPP1CB,GSN,ACTR3,ARPC2,ARPC3,TMSB10/TMSB4X,ACTG1,MYL12B,MYL12A
Unfolded protein response	2.51	Nan	PDIA2,CALR,DDIT3,PPP1R15A,HSPA6,HSPA2
Glutathione Redox Reactions I	2.48	Nan	GPX2,MGST3,GSTP1,PRDX6
PDAC vs LG
Ingenuity Canonical Pathways	-log(p-value)	z-score	Molecules
EIF2 Signaling	19	4.352	RPL22,MAPK1,RPS27,RPS23,RPLP2,RPL35A,HSPA5,RPS11,RPS7,EIF1,RPL13,RPS13,EIF5,RPL19,RPL32,ATF3,RRAS,EIF2S3,EIF3E,EIF2S2,RPL28,EIF3M,RPL9,RPS6,RPL15,HNRNPA1,IRS1,PPP1R15A,RPL10,RPS25,RPL6,INSR,RPL13A,EIF3K,RPL24,RPLP1,RPS18,PPP1CB,PPP1CC,UBA52,RPS12,RPS5,RPL18,RPL31,RPS24,RPS19,RPL4,NRAS,EIF3H,ACTB,RPL30,RPS10,RPS21,RPS29,FAU,RPL27,RPS16,RPS26,RPS27A,RPL5,RPS14,RPLP0
Remodeling of Epithelial Adherens Junctions	17.3	3.357	TUBA1B,NME1,RALA,RAB5C,ARPC1B,ARPC5,CTNNA1,RAB5B,IQGAP1,TUBB,ARF6,ACTR3,ARPC3,TUBA1C,VCL,CTNNB1,ACTN1,ACTR2,TUBB3,MAPRE1,ACTB,TUBB2A,RAB7A,MET,CDH1,TUBA1A,TUBB6,ARPC2,ZYX,ACTN4,ACTG1,ARPC4
Integrin Signaling	15.9	6.102	PFN1,MAP3K11,MAPK1,ARF1,ARPC5,TSPAN3,ITGA3,RHOG,RHOB,ITGAV,ITGB5,ACTR2,RRAS,RAC1,ITGA6,TNK2,GSN,MYL9,ARHGAP5,RND3,CDC42,RHOA,ARPC2,IRS1,CAPN1,ZYX,CAPN2,ACTN4,ITGB6,ACTG1,RAP1B,RALA,ARPC1B,PPP1CB,ITGB8,ARF6,ACTR3,RHOD,ARPC3,VCL,RHOF,ACTN1,MYL12B,VASP,MYL12A,ITGB1,PXN,NRAS,RHOC,ACTB,ITGA2,ITGB2,CAPNS1,TSPAN1,PAK2,CAPN9,ARPC4
Epithelial Adherens Junction Signaling	14.9	Nan	RAP1B,TUBA1B,MYH9,MYL6,ARPC1B,ARPC5,CTNNA1,BMPR2,AFDN,TUBB,IQGAP1,YES1,NOTCH2,ACTR3,ARPC3,TUBA1C,JUP,VCL,CTNNB1,ACTN1,VAV2,ACTR2,TUBB3,NRAS,LMO7,RRAS,MYH14,ACTB,TUBB2A,RAC1,MYL9,MET,CDH1,TUBA1A,TUBB6,CDC42,ARPC2,RHOA,ZYX,ACTN4,CLINT1,ACTG1,ARPC4,NECTIN2
Germ Cell-Sertoli Cell Junction Signaling	14.7	Nan	TUBA1B,MAP3K11,MAPK1,CTNNA1,AFDN,TUBB,IQGAP1,ITGA3,RHOG,RHOB,RHOD,TGFB1,TUBA1C,JUP,VCL,RHOF,CTNNB1,RAB8B,ACTN1,ITGB1,PXN,TUBB3,NRAS,CFL1,RRAS,RHOC,MAP3K13,ACTB,ITGA2,TUBB2A,RAC1,ITGA6,GSN,PLS1,CDH1,TUBA1A,RND3,TUBB6,CDC42,RHOA,IRS1,PAK2,ZYX,MAP3K8,ACTN4,CLINT1,ACTG1,NECTIN2
Sirtuin Signaling Pathway	13.3	1.067	TUBA1B,GABARAPL2,MAPK1,NDUFB5,HMGCS2,VDAC2,SCNN1A,SOD2,UQCRFS1,TUBA1C,ATP5F1,ATP5J,PGK1,CXCL8,PFKFB3,SLC2A1,SDHC,STAT3,TIMM17A,ATP5C1,CDH1,UQCRC2,SIRT1,NDUFA12,H1F0,VDAC1,XRCC5,TOMM40,RELA,ATP5G1,SDHB,GADD45B,GADD45G,DUSP6,HIF1A,BECN1,NDUFA2,GADD45A,H1FX,FOXO3,NDUFB6,NAMPT,MAP1LC3B,NFE2L2,NDUFAB1,NDUFB4,EPAS1,TRIM28,ATG3,TOMM20,NQO1,GLUD1,SF3A1,SOD1,NDUFA13,APP,TUBA1A,NDUFV2,ADAM10,TSPO,SDHD,LDHA…
RhoGDI Signaling	12.9	-5.284	MYL6,ARPC1B,RACK1,ARPC5,GNB1,ITGA3,RHOG,ACTR3,RHOB,CDH3,RHOD,EZR,ARPC3,RHOF,GNG5,GNG12,MYL12B,MYL12A,ITGB1,ACTR2,GNAS,ARHGEF12,CFL1,RHOC,ACTB,ITGA2,RAC1,ARHGDIB,MYL9,ARHGAP5,GNAI2,GNAI3,CDH1,RND3,CDC42,ARPC2,RHOA,ARHGEF16,PAK2,GNB2,CD44,ARHGAP35,ARHGEF18,ACTG1,ARPC4,MSN
Clathrin-mediated Endocytosis Signaling	12.1	Nan	SH3BP4,RAB5C,ARPC1B,PICALM,CLTB,ARPC5,NUMB,SH3GLB1,RAB5B,ITGB8,ARF6,CD2AP,AP1G2,ACTR3,SNX9,UBA52,ARPC3,SERPINA1,CSNK2B,ITGB5,MYO6,ITGB1,ACTR2,AP2M1,UBB,ACTB,CHP1,RAC1,RAB7A,MDM2,TSG101,AP2S1,UBD,MET,APOL1,ITGB2,CDC42,CLTA,ARPC2,IRS1,APOC1,RPS27A,RAB11A,ITGB6,UBC,ACTG1,ARPC4,RBP4
Leukocyte Extravasation Signaling	11.7	4.003	MYL6,MAPK1,AFDN,CLDN7,ITGA3,CYBA,EZR,TIMP2,CLDN18,RAC1,ITGA6,RAPGEF3,ARHGAP5,CLDN23,CDC42,RAP1GAP,IRS1,RHOA,ARHGAP35,ACTN4,ACTG1,RAP1B,CD99,MMP7,MMP15,CTNNA1,CLDN4,TIMP1,VCL,CTNNB1,MMP1,ACTN1,VASP,VAV2,ITGB1,CLDN10,PXN,ACTB,ITGA2,SELPLG,GNAI2,F11R,ITGB2,GNAI3,PRKCI,CLDN1,CD44,CLDN2,MSN
Sertoli Cell-Sertoli Cell Junction Signaling	11.6	Nan	SPTBN1,TUBA1B,MAP3K11,MAPK1,CTNNA1,AFDN,CLDN7,TUBB,ITGA3,CLDN4,CGN,TUBA1C,JUP,VCL,CTNNB1,RAB8B,ACTN1,ITGB1,CLDN10,TUBB3,NRAS,RRAS,MAP3K13,ACTB,CLDN18,ITGA2,TUBB2A,RAC1,YBX3,PLS1,F11R,CDH1,CLDN23,TUBA1A,TUBB6,CDC42,CLDN1,CLDN2,MAP3K8,SPTAN1,ACTN4,CLINT1,ACTG1,NECTIN2
ILK Signaling	11.1	4.32	RELA,FLNB,MYH9,MAPK1,MYL6,PPP2CA,BMP2,MUC1,HIF1A,ITGB8,PPP1R14B,RHOG,RHOB,FLNA,RHOD,VCL,TMSB10/TMSB4X,RHOF,CTNNB1,ACTN1,ITGB5,DSP,NACA,ITGB1,PXN,CFL1,RHOC,MYH14,ACTB,VIM,PPP2R5A,MYL9,ITGB2,FOS,PPP2CB,CDH1,RND3,CDC42,RHOA,IRS1,KRT18,RSU1,PTGS2,ACTN4,ITGB6,ACTG1
Regulation of Actin-based Motility by Rho	10.9	4.811	PFN1,ARPC1B,MYL6,ARPC5,PPP1CB,ITGA3,ACTR3,RHOG,RHOB,RHOD,ARPC3,RHOF,MYL12B,MYL12A,ITGB1,ACTR2,CFL1,RHOC,ACTB,ITGA2,RAC1,GSN,MYL9,RND3,CDC42,RHOA,ARPC2,PAK2,ARPC4
Signaling by Rho Family GTPases	10.8	6.03	MAP3K11,MAPK1,MYL6,ARPC5,RACK1,CDC42EP2,GNB1,STMN1,ITGA3,RHOG,RHOB,EZR,CDC42EP1,GNG12,ACTR2,CFL1,RAC1,MYL9,CDH1,RND3,CDC42,IRS1,ARPC2,ARHGEF16,RHOA,GNB2,ARHGEF18,ACTG1,RELA,ARPC1B,IQGAP1,ACTR3,RHOD,CDH3,ARPC3,RHOF,GNG5,MYL12B,MYL12A,ITGB1,ARHGEF12,GNAS,RHOC,ACTB,ITGA2,VIM,GNAI2,GNAI3,FOS,PRKCI,PAK2,ARPC4,MSN
Mitochondrial Dysfunction	10.4	Nan	ATP5G1,SDHB,ATP5H,COX6A1,PSENEN,PRDX5,UQCRH,NDUFB5,COX8A,ATP5L,CYB5R3,NDUFA2,VDAC2,SOD2,PARK7,NDUFB6,UQCRFS1,GPX4,ATP5F1,NDUFAB1,ATP5G3,COX4I1,ATP5J,ATP5G2,NDUFB4,COX6B1,COX7C,SDHC,NDUFA13,UQCRB,APP,ATP5C1,PRDX3,NDUFV2,APH1A,UQCRC2,COX5A,NDUFA12,SDHD,CYCS,VDAC1
Actin Nucleation by ARP-WASP Complex	10.3	4.69	ITGB1,ACTR2,NRAS,ARPC1B,RRAS,RHOC,ARPC5,ITGA2,RAC1,ITGA3,RHOG,ACTR3,RND3,RHOB,CDC42,RHOD,RHOA,ARPC2,ARPC3,RHOF,ARPC4,VASP
mTOR Signaling	10.3	3.411	MAPK1,RPS27,PPP2CA,RPS23,RPS18,FKBP1A,HIF1A,RPS11,RPS7,RHOG,RHOB,RPS13,RHOD,RHOF,RPS12,RPS5,RPS24,RPS19,RHEB,NRAS,EIF3H,DDIT4,RRAS,RHOC,RAC1,RPS10,RPS21,EIF3E,RPS29,PPP2R5A,EIF3M,FAU,RPS6,PPP2CB,RPS16,PRKCI,RND3,RPS26,RHOA,IRS1,RPS27A,RPS25,INSR,EIF3K,RPS14
Regulation of eIF4 and p70S6K Signaling	9.81	1.508	MAPK1,RPS27,PPP2CA,RPS23,RPS18,PAIP2,RPS11,RPS7,ITGA3,EIF1,RPS13,RPS12,RPS5,RPS24,ITGB1,RPS19,NRAS,EIF3H,RRAS,ITGA2,RPS10,EIF2S3,RPS21,EIF3E,RPS29,EIF2S2,PPP2R5A,EIF3M,FAU,RPS6,PPP2CB,RPS16,RPS26,IRS1,RPS27A,RPS25,EIF3K,RPS14
Tight Junction Signaling	9.55	Nan	RELA,MYH9,MYL6,PPP2CA,VAPA,CTNNA1,AFDN,CLDN7,CLDN4,TGFB1,CGN,VCL,CTNNB1,NAPA,VASP,TNFRSF11B,CLDN10,MYH14,ACTB,CRB3,CLDN18,RAC1,YBX3,CASK,PPP2R5A,MYL9,F11R,FOS,PPP2CB,CLDN23,PRKCI,CLDN1,CDC42,RHOA,NUDT21,CLDN2,SPTAN1,ACTG1,NECTIN2
Oxidative Phosphorylation	9.32	Nan	SDHB,ATP5G1,ATP5H,COX6A1,UQCRH,NDUFB5,COX8A,ATP5L,NDUFA2,UQCRFS1,NDUFB6,ATP5F1,NDUFAB1,ATP5G3,COX4I1,ATP5J,ATP5G2,NDUFB4,COX6B1,COX7C,SDHC,NDUFA13,UQCRB,ATP5C1,NDUFV2,UQCRC2,COX5A,SDHD,NDUFA12,CYCS
Actin Cytoskeleton Signaling	8.95	5.516	MYH9,PFN1,MAPK1,MYL6,ARPC1B,ARPC5,PPP1CB,IQGAP1,ITGA3,DIAPH1,ACTR3,FLNA,EZR,ARPC3,VCL,TMSB10/TMSB4X,GNG12,ACTN1,MYL12B,NCKAP1,MYL12A,VAV2,ITGB1,ACTR2,PXN,NRAS,ARHGEF12,CFL1,RRAS,MYH14,ACTB,ITGA2,RAC1,BRK1,GSN,MYL9,CDC42,ARPC2,RHOA,IRS1,PAK2,ARHGAP35,ACTN4,ACTG1,ARPC4,MSN
